# Supplementary material for: Nucleosome deposition and DNA methylation at coding region boundaries
Source: PubMed Central journal article supplement (PMC2768978; doi:10.1186/gb-2009-10-9-r89), 2009-09-01
Supplement: gb-2009-10-9-r89-S1.pdf [file gb-2009-10-9-r89-S1.pdf]

Figure S1

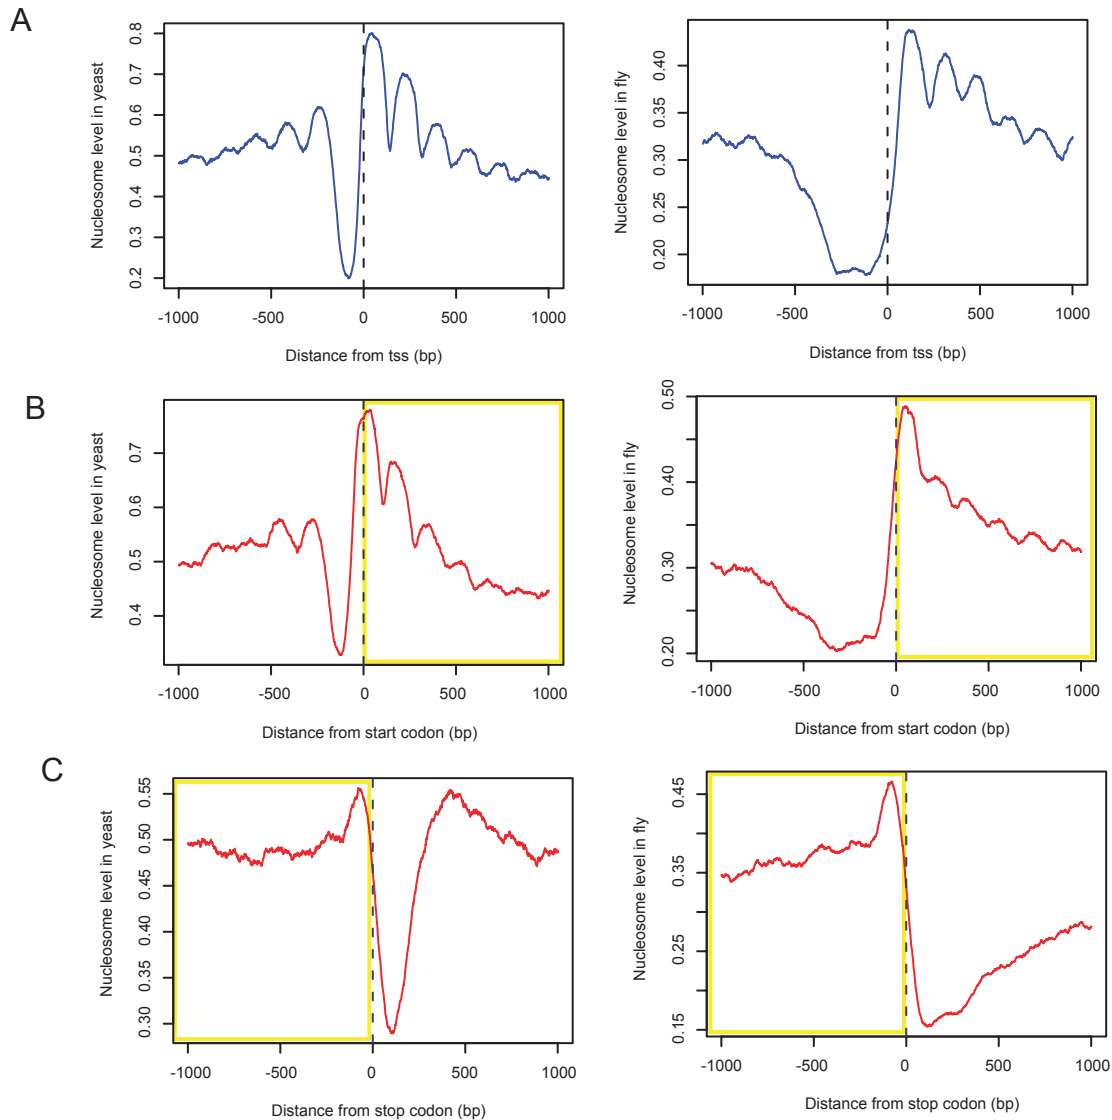

(A) Nucleosome occupancy surrounding the transcription start site. Genomewide average of nucleosome occupancy for yeast (left panel) and fly (right panel) was obtained for genes aligned at the transcription start site.

(B) Nucleosome occupancy surrounding the coding start site of yeast (left panel) and fly (right panel) genes. The inside of the coding region is outlined in yellow.

(C) Nucleosome occupancy surrounding the coding end site of yeast (left panel) and fly (right panel) genes. The inside of the coding region is outlined in yellow.
